# Supplementary material for: Twelve-month observational study of children with cancer in 41 countries during the COVID-19 pandemic
Source: PubMed Central journal article supplement — BMJ Glob Health. 2022 Oct 19;7(10):e008797. doi: 10.1136/bmjgh-2022-008797 (PMC9581782; doi:10.1136/bmjgh-2022-008797), 2022-10-19
Supplement: bmjgh-2022-008797supp001.pdf [file bmjgh-2022-008797supp001.pdf]

**Appendix S2: Participating Centres**

Abubakar Tafawa Balewa University Teaching Hospital, Nigeria  
Aga Khan University Hospital, Pakistan  
Ahmadu Bello University Teaching Hospital, Nigeria  
AIC Kijabe Hospital, Kenya  
Ain Shams Hospitals "El-Demerdash", Egypt  
Al-Basheer Hospital, Jordan  
Al-Hussein University Hospital, Egypt  
Alder Hey Children Hospital, UK  
All India Institute of Medical Sciences (AIIMS), Bhubaneshwar, India  
All India Institute of Medical Sciences (AIIMS), Rishikesh, India  
Augusta Victoria Hospital, Palestine  
Bangladesh Shishu Hospital & Institute, Bangladesh  
Benghazi pediatric hospital, Libya  
Birmingham Children's Hospital, UK  
Borg El Arab University Hospital, Egypt  
Centre Anti-Cancer, Batna, Algeria  
Centre hospitalier universitaire de Batna, Algeria  
Centre Hospitalo-Universitaire Ibn Sina de Rabat (CHIS), Morocco  
Centro Hospitalar Universitário de São João, Portugal  
Children's Hospital of Wisconsin, United States of America  
Chittagong Research Institute For Children Surgery, Bangladesh  
Christian Medical College & Hospital, Ludhiana, India  
Clinic for Neurosurgery, Clinical Center of Serbia, Serbia  
Dayanand Medical College & Hospital Ludhiana, India  
Dhaka Medical College Hospital, Bangladesh  
Dr. Lutfi Kirdar Kartal Training and Research Hospital, Turkey  
Dubai Hospital, United Arab Emirates  
El Safa Hospital, Egypt  
El Sheikh Zayed Specialized Hospital, Egypt  
El-Salam Hospital, Egypt  
Faculty of Medicine, University of Porto, Portugal  
Federal Medical Center, Abeokuta, Nigeria  
Federal Medical Center, Lokoja, Nigeria  
Federal Teaching Hospital Ido-Ekiti, Nigeria  
Frere Hospital, South Africa  
Gloucestershire Hospitals NHS Foundation Trust, United Kingdom  
GPACI - Grupo de Pesquisa e Assistência ao Câncer Infantil, Brazil  
Helwan University Hospital, Egypt  
Hôpital des Spécialités ONO, Morocco  
Ibn-Al-Atheer Teaching Hospital, Mosul, Iraq  
Indira Gandhi Institute of Medical Sciences (IGIMS), India  
Instituto Nacional de Enfermedades Neoplásicas, Peru  
Ipswich Hospital NHS Trust, UK  
Istanbul University, Turkey  
Jawaharlal Institute of Postgraduate Medical Education and Research, India  
John Radcliffe Hospital, United Kingdom  
Johns Hopkins Hospital Bloomberg Children's Hospital, United States of America  
Kanuni Sultan Süleyman Research and Training Hospital, Turkey

Kasr Al Ainy Hospital, Egypt  
Khoula Hospital, Oman  
King Abdullah University Hospital, Jordan  
King Fahd Central Hospital, Saudi Arabia  
King George's Medical University, India  
King Hussein Cancer Center, Jordan  
King Salman Armed Forces Hospital, Saudi Arabia  
KK Women's and Children's Hospital, Singapore  
Lagos University Teaching Hospital, Nigeria  
Lahore General Hospital, Pakistan  
Liaquat National Hospital and Medical College, Pakistan  
Mansoura University Hospitals, Egypt  
Mater Dei Hospital, Sir Anthony Mamo Oncology Centre, Malta  
Mayo Clinic, United States of America  
Mbeya Zonal Referral Hospital, University of Dar es Salaam, Tanzania  
Medical University of Pecs, Department of Paediatrics, Hungary  
Menoufia University Hospital, Egypt  
Ministry of Health Marmara University Pendik Research and Application Hospital, Turkey  
MISR Cancer Centre, Egypt  
National Cancer Institute, Brazil  
National Cancer Institute, Sudan  
National Hospital, Nigeria  
Nnamdi Azikiwe University Teaching Hospital, Nigeria  
Ola Doring Children's Hospital, Sierra Leone  
Olabisi Onabanjo University Teaching Hospital, Nigeria  
Ondokuz Mayıs Üniversitesi, Turkey  
Pantai Jerudong Specialist Centre, Brunei  
Pediatric Oncology Institute – GRAACC, Brazil  
Policlinico Umberto I, Sapienza University of Rome, Italy  
Post Graduate Institute of Medical Education and Research, Chandigarh, India  
Prince Mohammed bin Nasser Hospital, Jazan, Saudi Arabia  
Prince Sattam Bin Abdulaziz University, Saudi Arabia  
Raparin Pediatric Teaching Hospital, Iraq  
RIPAS Hospital, Brunei  
Saadna Mohamed Abdenour, Algeria  
Salmaniya Medical Complex, Bahrain  
Shahid Baghaei Hospital, Iran  
Sheba Medical Center/Tel HaShomer Hospital, Israel  
St. George's Hospital, UK  
Sultan Qaboos University Hospital, Muscat Sultanate of Oman  
Tamale Teaching Hospital, Ghana  
Tanta University Hospital, Egypt  
The Hospital for Sick Children, Canada  
The Indus Hospital, Pakistan  
Tishreen University Hospital, Syria  
Tobruk Medical Centre, Libya  
Tripoli University Hospital, Libya  
Unit of Paediatric and Adolescent Haematology and Oncology, 2nd Department of  
Paediatrics, Aristotle University of Thessaloniki, University General Hospital AHEPA,  
Greece

Universiti Kebangsaan Malaysia Medical Centre, Malaysia  
University College Hospital (UCH), Nigeria  
University Hospital Hamburg-Eppendorf, Germany  
University of Abuja Teaching Hospital, Nigeria  
University of Ilorin Teaching Hospital, Nigeria  
University of Malaya Medical Centre, Malaysia  
University of Texas Medical Branch, United States of America  
University Teaching Hospital, Zambia  
Usman Danfodiyo University Teaching Hospital, Nigeria  
Vall d'Hebron University Hospital, Spain  
Wingat Royal Hospital, Egypt  
Yale New Haven Hospital, United States of America  
Zagazig University Hospital, Egypt
