# Supplementary material for: Twelve-month observational study of children with cancer in 41 countries during the COVID-19 pandemic
Source: PubMed Central journal article supplement — BMJ Glob Health. 2022 Oct 19;7(10):e008797. doi: 10.1136/bmjgh-2022-008797 (PMC9581782; doi:10.1136/bmjgh-2022-008797), 2022-10-19
Supplement: bmjgh-2022-008797supp002.pdf [file bmjgh-2022-008797supp002.pdf]

## **Appendix S1: Global Children's NCDs Collaborative**

### **Steering committee:**

Soham Bandyopadhyay [UK], Noel Peter [UK] (Asia Lead), Kokila Lakhoo [UK], Simone de Campos Vieira Abib [Brazil] (South America Lead), Hafeez Abdelhafeez [Sudan] (Africa and Middle East Lead), Shaun Wilson [UK] (Australasia Lead), Max Pacht [UK] (Europe and North America Lead), Benjamin Martin [UK] (Europe Lead), Sonal Nagras [Australia] (Australasia Lead), and Mihir Sheth [India]

### **Operational committee:**

Catherine Dominic [UK], Suraj Gandhi [UK], Divya Parwani [India], Rhea Raj [UAE], Diella Munezero [Burundi], Rohini Dutta [India], Nsimire Mulanga Roseline [DRC], Kellie McClafferty [UK], Armin Nazari [UK], Smrithi Sriram [UK], Sai Pillarisetti [UK], King-David Nweze [UK], Aishwarya Ashwinee [Grenada], Gul Kalra [India], Poorvaprabha Patil [India], Priyansh Nathani [India], Khushman Kaur Bhullar [India], Muhammed Elhadi [Libya], Maryam Khan [Pakistan], Nehal Rahim [Pakistan], Shweta Madhusudanan [UK], Joshua Erhabor [UK], Manasi Shirke [UK], Aishah Mughal [UK], Darica Au [UK], Mahan Salehi [UK], Sravani Royyuru [UK], Mohamed Ahmed [Egypt], Syeda Namayah Fatima Hussain [Pakistan], Daniel Robinson [UK], Anna Casey [UK], Mehdi Khan [UK], Alexandre Dukundane [Rwanda], Kwizera Festus [Rwanda], Vaishnavi Govind [Grenada], Rohan Pancharatnam [UK], Lorraine Ochieng [UK], Elliott H Taylor [UK], Hritik Nautiyal [UK], Marta de Andres Crespo [UK], Somy Charuvila [UK], and Alexandra Valetopoulou [UK]

### **Writing committee:**

Soham Bandyopadhyay [UK], Amanpreet Brar [Canada], Hira Zuberi [Pakistan], Imane Ammouze [Morocco], Dhruva Ghosh [India], Nitin James Peters [India], Noel Peter [UK], and Kokila Lakhoo [UK]

### **Statistics committee:**

Soham Bandyopadhyay [UK] and Mihir Sheth [India]

### **Local teams:**

#### **Abubakar Tafawa Balewa University Teaching Hospital, Nigeria**

Kefas John Bwala

AM Umar

Abdurahaman Aremu

Dauda E. Suleiman

Tybat Aliyu

#### **Aga Khan University Hospital, Pakistan**

Ayesha Saleem

Muhammad Arshad

Kashaf Turk

Sadaf Altaf

#### **Ahmadu Bello University Teaching Hospital, Nigeria**

Oluseyi Oyebode Ogunsua

Tunde Talib Sholadoye

Musliu Adetola Tolani

Yakubu Alfa

Keffi Mubarak Musa

#### **AIC Kijabe Hospital, Kenya**

Eric Mwangi Irungu

Ken Muma

Sarah Muma

Mitchelle Obat

**Ain Shams Hospitals "El-Demerdash", Egypt**

Youssef Sameh Badran

**Al-Basheer Hospital, Jordan**

Abdulrahman Ghassan Qasem

Faris Ayasra

Reema Alnajjar

**Al-Hussein University Hospital, Egypt**

Mohamed Abdel-Maboud

Abdelrahman Bahaa

Ayat M. Saadeldin

Mohamed Adwi

Mahmoud Adly

Abdallah Elshenawy

**Alder Hey Children Hospital, UK**

Amer Harky

Leanne Gentle

Kirstie Wright

Jessica Luyt

Olivia White

Charlotte Smith

Nathan Thompson

Thomas Smith

Imogen Harrison

**All India Institute of Medical Sciences (AIIMS), Bhubaneshwar, India**

Santosh Kumar Mahalik

**All India Institute of Medical Sciences (AIIMS), Rishikesh, India**

Rajat Piplani

Enono Yhoshu

Manoj Gupta

Uttam Kumar Nath

Amit Sehrawat

Rajkumar K S

Vivek Singh

**Augusta Victoria Hospital, Palestine**

Sadi A. Abukhalaf

**Bangladesh Shishu Hospital & Institute, Bangladesh**

Ashrarur Rahman Mitul

Sabbir Karim

Nazmul Islam

**Benghazi pediatric hospital, Libya**

Sara Kader Alsaeiti

Fatma Saleh Benkhial

Mohammed Miftah Faraj Almihashhish

Eman Salem Muftah Burzeiza

Hend Mohammed Masoud

Mabroukah Saeid Alshamikh

Raja Mari Mohammed Nasef

Fatma Mohammed Masoud

**Birmingham Children's Hospital, UK**

William B Lo

Nyararai Togarepi

Elaine Carrolan

Benjamin Martin

Max Pachl

Benjamin J O'Sullivan

**Borg El Arab University Hospital, Egypt**

Mohamed Hassanin

Ahmed Saleh

Mahmoud Bassiony

Mostafa Qatora

Mohamed Bahaaeldin

Shady Fadel

Yasmine El Chazli

**Centre Anti-Cancer, Batna, Algeria**

Anfel Bouderbala

Kamel Hamizi

Safia Lorabi

Mehdi Anouar Zekkour

Rima Rahmoun

Boutheyna Drid

Salma Naje Abu Teir

**Centre hospitalier universitaire de Batna, Algeria**

Safia Lorabi

Mohamed Yazid Kadir

Yassine Zerizer

Nacer Khernane

Brahim Saada

**Centre Hospitalo-Universitaire Ibn Sina de Rabat (CHIS), Morocco**

Imane Ammouze

Yahya Elkaoune

Hajar Moujtahid

Ghita Chaoui

Hajar Benaouda

Meryem Gounni

Narjiss Aji

Laila Hessissen

**Centro Hospitalar Universitário de São João, Portugal**

Joana Mafalda Monteiro

Susana Nunes

Maria do Bom-Sucesso

**Children's Hospital of Wisconsin, United States of America**

Dave R. Lal

Brian T. Craig

Kerri Beckett

**Chittagong Research Institute For Children Surgery, Bangladesh**

Tahmina Banu

Md Afrozul Alam

Orindom Shing Pulock

Tasmiah Tahera Aziz

**Christian Medical College & Hospital, Ludhiana, India**

Vishal Michael

M Joseph John

William Bhatti

Bobby John

Swati Daniel

Jyoti Dhiman

Hunar Mahal

Atul Suroy

**Clinic for Neurosurgery, Clinical Center of Serbia, Serbia**

Rosanda Ilic

Danica Grujicic

Tijana Nastasovic

Igor Lazic

Mihailo Milicevic

Vladimir Bascarevic

Radovan Mijalcic

Vuk Scepanovic

Aleksandar Stanimirovic

Aleksandra Paunovic

Ivan Bogdanovic

**Dayanand Medical College & Hospital Ludhiana, India**

Shruti Kakkar

Shaina Kamboj

Suraj Singh

**Dhaka Medical College Hospital, Bangladesh**

Shahnoor Islam

AKM Amirul Morshed

A. K. M. Khairul Basher

Mehnaz Akter

S. M. Rezanur Rahman

Zannat Ara

Mohammed Tanvir Ahammed

Tania Akter

Kamrun Nahar

Fatema Sayed

Ashfaque Nabi

Md. Asif Iqbal

Md. Masud Rana

Md. Asaduzzaman

Md. Hasanuzzaman

**Dr. Lutfi Kirdar Kartal Training and Research Hospital, Turkey**

Kemal Tolga Saracoglu

Elif Akova

Evren Aydogmus

Bekir Can Kendirlioglu

Tufan Hicdonmez

**Dubai Hospital, United Arab Emirates**

Arshiya Adhnon

Asim Noor Rana

Hani Humad

Anjan Madasu

**El Safa Hospital, Egypt**

Ahmed Y Azzam

Mohammed A Azab

**El Sheikh Zayed Specialized Hospital, Egypt**

Sherief Ghozy

Alzhraa Salah Abbas

**El-Salam Hospital, Egypt**

Monica Dobs

Mohamed Atef Mohamed Ghamry

Mohammed Alhendy

**Faculty of Medicine, University of Porto, Portugal**

Joana Monteiro

**Federal Medical Center, Abeokuta, Nigeria**

Olanrewaju Moses

**Federal Medical Center, Lokoja, Nigeria**

Ibiyeye Taiye Taibat

Taiwo Jones

Kalu Ukoha

Olagundoye Goke

Okorie Ikechukwu

**Federal Teaching Hospital Ido-Ekiti, Nigeria**

Abiodun Idowu Okunlola

**Frere Hospital, South Africa**

Milind Chitnis

Helga Nauhaus

Danelle Erwee

**Gloucestershire Hospitals NHS Foundation Trust, United Kingdom**

Robyn Brown

Agata Chylinska

Robin Simpson

Prasanna Gomes

Noel Peter

**GPACI - Grupo de Pesquisa e Assistência ao Câncer Infantil, Brazil**

Marco Aurelio Ciriaco Padilha

Elvercio Pereira de Oliveira Junior

Lucas Garschagen de Carvalho

Fabiola Leonelli Diz

**Helwan University Hospital, Egypt**

Mohamed El Kassas

Usama Eldaly

Ahmed Tawheed

Mohamed Abdelwahab

**Hôpital des Spécialités ONO, Morocco**

Oudrhiri Mohammed Yassaad

Bechri Hajar

El Ouahabi Abdessamad

Arkha Yasser

Hessissen Laila

**Ibn-Al-Atheer Teaching Hospital, Mosul, Iraq**

Farah Sameer Yahya (Department of Pediatrics, College of Medicine, University of Mosul, Mosul, Iraq)

Yasir Al-Agele

**Indira Gandhi Institute of Medical Sciences (IGIMS), India**

Sandip Kumar Rahul

Vijayendra Kumar

Digamber Chaubey

**Instituto Nacional de Enfermedades Neoplásicas, Peru**

Maria Teresa Peña Gallardo

Jacqueline Elizabeth Montoya Vásquez

Juan Luis García León

Sebastián Shu Yip

**Ipswich Hospital NHS Trust, UK**

Georgios Karagiannidis

**Istanbul University, Turkey**

Rejin Kebudi

Sema Bay Buyukkapu

**Jawaharlal Institute of Postgraduate Medical Education and Research, India**

Krishna Kumar Govindarajan

Kumaravel Sambandan

Smita Kayal

Gunaseelan Karunanithi

Bikash Kumar Naredi

Bibekanand Jindal

**John Radcliffe Hospital, United Kingdom**

Mariam Lami

Matthew H V Byrne

Duha Jasim

Harmit Ghattaura

Soham Bandyopadhyay

Kokila Lakhoo

**Johns Hopkins Hospital Bloomberg Children's Hospital, United States of America**

Eric W Etchill

Daniel Rhee

Stacy Cooper

Kevin Crow

Morgan Drucker

Megan Murphy

Benjamin Shou

Alan Siegel

**Kanuni Sultan Süleyman Research and Training Hospital, Turkey**

Yasin Kara

Gül Nihal Özdemir

**Kasr Al Ainy Hospital, Egypt**

Mahmoud Elfiky

Ehab El Refaee

**Khoula Hospital, Oman**

John George Massoud

**King Abdullah University Hospital, Jordan**

Ayah Bassam Ibrahim

Ruaa Bassam Ibrahim

Faris Abu Za'nouneh

Ranya M. Baddourah

Toqa Fahmawee

Ayah Al\_Shraideh

**King Fahd Central Hospital, Saudi Arabia**

Ghazwani Salman

Ehab Alameer (Jazan University)

Al-Mudeer Ali

Ghazwani Yahia

Khozairi Waleed

**King George's Medical University, India**

Ahmad Ozair

Ankur Bajaj

Bal Krishna Ojha

Kaushal Kishor Singh

Atique Anwar

Vinay Suresh

**King Hussein Cancer Center, Jordan**

Mohamad K. Abou Chaar

Iyad Sultan

Khalil Ghandour

Shaima' Al-Dabaibeh

Ammar Al-Basiti

Hazim Ababneh

Omaima El-Qurneh

**King Salman Armed Forces Hospital, Saudi Arabia**

Yousef Alalawi

Ahmad Al Ayed

Ehab Hanafy

Naif Al Bolowi

**KK Women's and Children's Hospital, Singapore**

Amos HP Loh

Anette S Jacobsen

Heidi Barola

Aubrey L Pagaduan

Jingdan Fan

**Lagos University Teaching Hospital, Nigeria**

Olumide Abiodun Elebute

Adesoji O. Ademuyiwa

Christopher O. Bode

Justina O. Seyi-Olajide

Oluwaseun Ladipo-Ajayi

Felix M. Alakaloko

George C. Ihediwa

Kareem O. Musa

Edamisan O. Temiye

Olufemi Oni

Adeseye M. Akinsete

**Lahore General Hospital, Pakistan**

Janita Zarrish

Ramsha Saleem

Soha Zahid

Atiqa Amirali

Ahsan Nadeem

Sameer Saleem Tebha

Zonaira Qayyum

Sana Tahir

Anneqa Tahir

Rabbey Raza Khan

Ayesha Mehmood

Iqra Effendi

**Liaquat National Hospital and Medical College, Pakistan**

Muhammad Arshad

Taimur Iftikhar Qureshi

Pooja Kumari

**Mansoura University Hospitals, Egypt**

Mohamed Bonna

Khaled Mamdouh

Mohamed Atef

Mohamed Faried

**Mater Dei Hospital, Sir Anthony Mamo Oncology Centre, Malta**

Victor Calvagna

Nathalie Galea

Ariana Axiaq

**Mayo Clinic, United States of America**

Matthew R Schuelke

Jake A. Kloeber

Robert L. Owen

Alexander S. Roth

Catherine Yang

J. Hudson Barnett

Lucien P. Jay

Kirk David Wyatt

Paul J. Galardy

**Mbeya Zonal Referral Hospital, University of Dar es Salaam, Tanzania**

Bernard Mbwele

Irene Nguma

Moshi Moshi Shabani

Amani Twaha

Bilal Matola

**Medical University of Pecs, Department of Paediatrics, Hungary**

Agnes Vojcek

**Menoufia University Hospital, Egypt**

Mahmoud Maher Abdelnaby Alrahawy

Seham M Ragab



Abdallah R Allam  
Eman Ibrahim Hager  
Abdelrahman Azzam  
Ammar Ayman  
**Ministry of Health Marmara University Pendik Research and Application Hospital,  
Turkey**  
Kıvılcım Karadeniz Cerit  
Adnan Dağçınar  
Tümay Umuroğlu  
Ayten Saraçoğlu  
Mustafa Sakar  
Can Kıvrak  
Gül Çakmak  
**MISR Cancer Centre, Egypt**  
Ibrahim Sallam  
Gamal Amira  
Mohamed Sherief  
Ahmed Sherif  
**National Cancer Institute, Brazil**  
Simone de Oliveira Coelho  
Arisa Ikeda  
Licia Portela  
Marianne Monteiro Garrigo  
Ricardo Vianna de Carvalho  
Fernanda Lobo  
Sima Ester Ferman  
Fernanda Ferreira da Silva Lima  
**National Cancer Institute, Sudan**  
Moawia Mohammed Ali Elhassan  
Nada Osman Yousif Elhaj  
Hytham K. S. Hamid  
**National Hospital, Nigeria**  
Emmanuel A. Ameh  
Vincent E. Nwatah  
Adewumi B. Oyesakin  
**Nnamdi Azikiwe University Teaching Hospital, Nigeria**  
Andrew Nwankwo Osuigwe  
Okechukwu Hyginus Ekwunife  
Chisom Adaobi Nri-Ezedi  
Eric Okechukwu Umeh  
**Ola Daring Children's Hospital, Sierra Leone**  
Nellie Bell  
**Olabisi Onabanjo University Teaching Hospital, Nigeria**  
Ibukunolu Olufemi Ogundele  
Abiodun Folashade Adekanmbi  
Olubunmi Motunrayo Fatungase  
Olubunmi Obafemi Obadaini  
**Ondokuz Mayıs Üniversitesi, Turkey**  
Sarah Al-Furais  
Humaida Hemlae

Sreylis Nay

**Pantai Jerudong Specialist Centre, Brunei**

John Mathew

R M Jeffri Ismail

**Pediatric Oncology Institute – GRAACC, Brazil**

Simone de Campos Vieira Abib

Fabianne Altruda de Moraes Costa Carlesse

Mayara Caroline Amorim Fanelli

Fernanda Kelly Marques de Souza

**Policlinico Umberto I, Sapienza University of Rome, Italy**

Pierfrancesco Lapolla

Andrea Mingoli

Denis Cozzi

Anna Maria Testi

Paolo Musiu

Paolo Sapienza

Gioia Brachini

Martina Zambon

Simona Meneghini

Pierfranco Cicerchia

Bruno Cirillo

**Post Graduate Institute of Medical Education and Research, Chandigarh, India**

Manjul Tripathi

Nitin James Peters

Sandeep Mohindra

Vishal Kumar

Ninad R Patil

Richa Jain

Renu Madan

Madhivanan Karthigeyan

Pravin Salunke

**Prince Mohammed bin Nasser Hospital, Jazan, Saudi Arabia**

Ghazwani Salman

**Prince Sattam Bin Abdulaziz University, Saudi Arabia**

Gopal Nambi

**Raparin Pediatric Teaching Hospital, Iraq**

Abdulrahman Omar Taha

**RIPAS Hospital, Brunei**

Janice Hui Ling Wong

Norehan Johari

Anas Shikha

Win Sabai Phyu Han

Zahidah Ahmad

Yen Yan Lim

Roserahayu Idros

Noorainun Mohd Yusof

David Nelson Jaisingh

**Saadna Mohamed Abdenour, Algeria**

Aouabed Nesrine

Bouaoud Souad

Mebarki Malika  
Bioud Belkacem  
**Salmaniya Medical Complex, Bahrain**  
Fayza Haider  
Fatema Naser Al Fayeze  
**Shahid Baghaei Hospital, Iran**  
Fakher Rahim  
**Sheba Medical Center/Tel HaShomer Hospital**  
Elana Kleinman  
Taylor Ibelli  
Emily Hamilton  
Rochelle Fayngor  
Tzvi Najman  
Gideon Karplus  
Etai Adam  
Daniella Melamed  
Cecilia Paasche  
**St. George's Hospital, UK**  
Amir Labib  
**Sultan Qaboos University Hospital, Muscat Sultanate of Oman**  
Farman Ali Laghari  
Dhruva Ghosh  
Zainab Al Balushi  
Abdulkhaleq Awadh Salim Al-Rawas  
Ali Al Sharqi  
Ammar Saif Al Shabibi  
Ismail Al Bulushi  
Muna Alshahri  
Abdulrahman AlMirza  
Ola Al Hamadani  
Jawaher Al Sharqi  
Anisa Al Shamsi  
Bashar Dawud  
Sareya Al Sibai  
**Tamale Teaching Hospital, Ghana**  
Alhassan Abdul-Mumin  
Halwani Yaninga Fuseini  
Peter Gyamfi Kwarteng  
Abubakari Bawa Abdulai  
Sheba Mary Pognaa Kunfah  
Gilbert B. Bonsaana  
Stephanie Ajinkpang  
Edmund M. Der  
Francis A. Abantanga  
Mary Joan Kpiniong  
Kingsley Aseye Hattor  
Kingsley Appiah Bimpong  
**Tanta University Hospital, Egypt**  
Mohamed Elbahnasawy  
Sherief Abdelsalam

Ahmed Samir

**The Hospital for Sick Children, Canada**

Reto M. Baertschiger

Amanpreet Brar

Andreea C. Matei

Augusto Zani

**The Indus Hospital, Pakistan**

Lubna Samad

Hira Khalid Zuberi

Kishwer Nadeem

Naema Khayyam

Fatima Ambreen Imran

Nida Zia

Sadia Muhammad

Muhammad Rafie Raza

Muhammad Rahil Khan

**Tishreen University Hospital, Syria**

Alaa Hamdan

Ammar Omran

Ahmed Moussa

Bardisan Gawrieh

Hassan Salloum

Alaa Ahmed

Abdeljawad Mazloun

Ali Abodest

Nisreen Ali

Munawar Hraib

Victor Khoury

Abdulrahman Almjersah

Mohammad Ali Deeb

Mohammad Ahmad Almahmod Alkhalil

Akram Ahmed

Waseem Shater

Ali Farid Alelayan

Alaa Guzman

**Tobruk Medical Centre, Libya**

Ahmad Bouhuwaish

Alqasim Abdulkarim

**Tripoli University Hospital, Libya**

Eman Abdulwahed

Marwa Biala

Reem Ghamgh

Amani Alamre

Marwa Shelft

Asmaa A. M. Albanna

Hoda Tawel

**Unit of Paediatric and Adolescent Haematology and Oncology, 2nd Department of Paediatrics, Aristotle University of Thessaloniki, University General Hospital AHEPA, Greece**

Emmanuel Hatzipantelis

Athanasios Tragiannidis

Eleni Tsotridou

Assimina Galli-Tsinopoulou

**Universiti Kebangsaan Malaysia Medical Centre, Malaysia**

Dayang Anita Abdul Aziz

Zarina Abdul Latiff

Hamidah Alias

C-Khai Loh

Doris Lau

Azrina Syarizad Khutubul Zaman

**University College Hospital (UCH), Nigeria**

Taiwo Akeem Lawal

Kelvin Ifeanyichukwu Egbuchulem

Olakayode Olaolu Ogundoyin

Isaac Dare Olulana

Biobele J. Brown

Oluwasegun Joshua Afolaranmi

AbdulBasit Fehintola

**University Hospital Hamburg-Eppendorf, Germany**

Annika Heuer

Christine Nitschke

Michael Boettcher

Matthias Priemel

Lennart Viezens

Martin Stangenberg

Marc Dreimann

Alonja Reiter

Jasmin Meyer

Leon Köpke

Karl-Heinz Frosch

**University of Abuja Teaching Hospital, Nigeria**

Samson Olori

Uduak Offiong

Philip Mari Mshelbwala

Fashie Andrew Patrick

Aminu Muhammed Umar

Otene ThankGod N.

**University of Ilorin Teaching Hospital, Nigeria**

Abdulrasheed A Nasir

Kazeem O. O. Ibrahim

Dupe S. Ademola-Popoola

Olayinka T. Sayomi

Alege Abdurrzaq

Ademola A. Adeyeye

Khadijah O. Omokanye

Lukman O Abdur-Rahman

Olubisi Olutosin Bamidele

Shakirullah AbdulAzeez

Aminat Akinoso

Michael O. Adegboye

**University of Malaya Medical Centre, Malaysia**

Shireen Anne Nah

Yuki Julius Ng

Syukri Ahmad Zubaidi

**University of Texas Medical Branch, United States of America**

Murad Almasri

Sara Ali

Rasaq Olaosebikan

Akila Muthukumar

**University Teaching Hospital, Zambia**

Patricia Shinondo

Amon Ngongola

Bruce Bvulani

Azad Patel

**Usman Danfodiyo University Teaching Hospital, Nigeria**

Abdullahi Nuhu-Koko

Baba Jibrin

Ajiboye L. Olalekan

Christopher S. Lukong

Ezekiel I. Ajayi

**Vall d'Hebron University Hospital, Spain**

Gabriela Guillén

Sergio López

José Andrés Molino

Pablo Velasco

**Wingat Royal Hospital, Egypt**

Omar Elmandouh

Omar Hamam

Rim Elmandouh

**Yale New Haven Hospital, United States of America**

Nensi Melissa Ruzgar

Rachel Levinson

Shashwat Kala

Sarah Ullrich

Emily Christison-Lagay

**Zagazig University Hospital, Egypt**

Aya Sabry Mortada

Mahmoud Ahmed Ebada

Eman Seif Alnaser Solimam

Khaled Abualkher

Amr Mohammed Elsayed Yousf

Mohamed Mohamed Holail

Reem Mohamed Almowafy

**National/Regional Leads:**

Algeria: Salah Eddine Oussama Kacimi

Bahrain: Fayza Haider

Bangladesh: Tahmina Banu, Ashrarur Rahman Mitul

Brazil: Simone de Campos Vieira Abib

Brunei: Janice Hui Ling Wong

Canada: Reto Baertschiger  
Egypt: Essam Elhalaby, Muath Alser, Mahmoud M. Saad  
France: Luca Pio  
Germany: Guido Seitz, Judith Lindbert  
Ghana: Francis Abantanga  
Greece: Georgios Tsoulfas, Asimina Galli-Tsinopoulou  
Hungary: Agnes Vojcek  
India: Dhruva Ghosh, Nitin James Peter, Ankur Bajaj, Vrisha Madhuri, Ravi Kishore  
Iran: Maryam Ghavami Adel  
Iraq: Abdulrahman Omar Taha  
Italy: Calogero Virgone, Francesco Pata, Gaetano Gallo  
Jordan: Mohammad K. Abou Chaar, Faris Ayasra  
Kenya: Eric Mwangi Irungu  
Libya: Muhammed Elhadi  
Malaysia: Shireen Anne Nah, Dayang Anita Abdul Aziz  
Malta: Victor Calvagna  
Morocco: Outani Oumaima, Zineb Bentounsi, Hajar Moujtahid  
Nigeria: Adesoji Ademuyiwa  
Oman: Dhruva Nath Ghosh  
Pakistan: Muhammad Arshad, Lubna Samad  
Peru: Lily Saldana  
Portugal: Jan Godzinsky  
Saudi Arabia: Abdelbasit Ali, Ehab Alameer  
Serbia: Dragana Janic  
Sierra Leone: Mohamed Bella Jalloh, Nellie Bell  
Singapore: Annette Jacobsen, Chan Hon Chui  
South Africa: Milind Chitnis  
Spain: Israel Fernandez Pineda, Lucas Krauel, Maricarmen Olivos  
Sudan: Waha Rahama, Hazim Elfatih  
Switzerland: Raphael N. Vuille-dit-Bille  
Syria: Alaa Hamdan  
Turkey: Arda Isik  
United Arab Emirates: Asim Noor Rana  
United Kingdom: Kokila Lakhoo, Kate Cross, Max Pacht  
United States of America: Andrea Hayes-Jordan, Roshni Dasgupta  
Zambia: Patricia Shinondo, Amon Ngongola  
Middle-East and North Africa: Mohamedraed Elshami
