# Supplementary material for: Twelve-month observational study of children with cancer in 41 countries during the COVID-19 pandemic
Source: PubMed Central journal article supplement — BMJ Glob Health. 2022 Oct 19;7(10):e008797. doi: 10.1136/bmjgh-2022-008797 (PMC9581782; doi:10.1136/bmjgh-2022-008797), 2022-10-19
Supplement: bmjgh-2022-008797supp004.pdf [file bmjgh-2022-008797supp004.pdf]

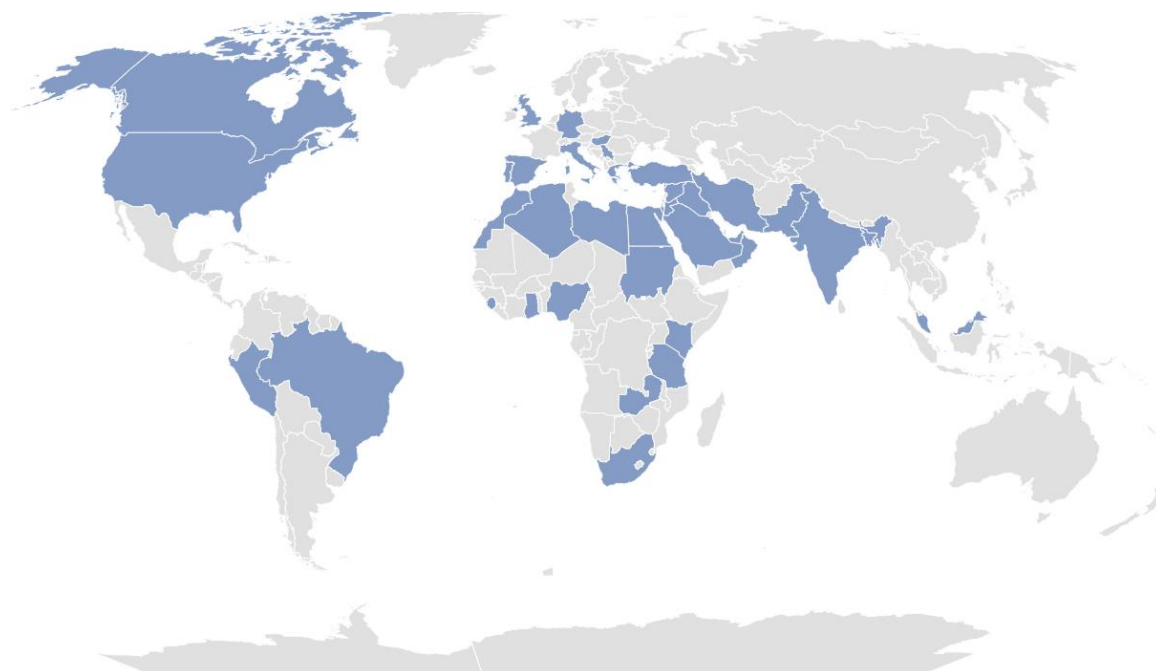

*Countries participating in this study shaded in blue*

|            |                    |
|------------|--------------------|
| Algeria    | – 55 participants  |
| Bahrain    | – 19 participants  |
| Bangladesh | – 58 participants  |
| Brazil     | – 139 participants |
| Brunei     | – 16 participants  |
| Canada     | – 43 participants  |
| Egypt      | – 66 participants  |
| Germany    | – 3 participants   |
| Ghana      | – 8 participants   |
| Greece     | – 23 participants  |
| Hungary    | – 20 participants  |
| India      | – 195 participants |
| Iran       | – 1 participant    |
| Iraq       | – 10 participants  |
| Israel     | – 3 participants   |
| Italy      | – 29 participants  |
| Jordan     | – 262 participants |
| Kenya      | – 9 participants   |
| Libya      | – 34 participants  |
| Malaysia   | – 40 participants  |
| Malta      | – 16 participants  |
| Morocco    | – 98 participants  |
| Nigeria    | – 126 participants |
| Oman       | – 49 participants  |
| Pakistan   | – 132 participants |
| Peru       | – 5 participants   |

Portugal – 12 participants  
Saudi Arabia – 15 participants  
Serbia – 24 participants  
Sierra Leone – 6 participants  
Singapore – 38 participants  
South Africa – 71 participants  
Spain – 106 participants  
Sudan – 11 participants  
Syria – 19 participants  
Tanzania – 4 participants  
Turkey – 63 participants  
United Arab Emirates – 24 participants  
United Kingdom – 152 participants  
United States of America – 100 participants  
Zambia – 14 participants
