# Supplementary material for: Twelve-month observational study of children with cancer in 41 countries during the COVID-19 pandemic
Source: PubMed Central journal article supplement — BMJ Glob Health. 2022 Oct 19;7(10):e008797. doi: 10.1136/bmjgh-2022-008797 (PMC9581782; doi:10.1136/bmjgh-2022-008797), 2022-10-19
Supplement: bmjgh-2022-008797supp005.pdf [file bmjgh-2022-008797supp005.pdf]

### Appendix S4 – Health system framework factors affected by the COVID-19 pandemic by World Bank income group

| Number of patients affected by treatment type and World Bank income group                                                            | Changes to treatment due to the COVID-19 pandemic                                                                                                                                                                                                                                                                                                                                                                                                                                                                                                                                                                                                                                                                                                                                                                                                                                                                                                                                                                                                                                                                                                                                                                                                                                                                                                                                                                                                                                                                                                                                                                                                                                                                                                                                 |
|--------------------------------------------------------------------------------------------------------------------------------------|-----------------------------------------------------------------------------------------------------------------------------------------------------------------------------------------------------------------------------------------------------------------------------------------------------------------------------------------------------------------------------------------------------------------------------------------------------------------------------------------------------------------------------------------------------------------------------------------------------------------------------------------------------------------------------------------------------------------------------------------------------------------------------------------------------------------------------------------------------------------------------------------------------------------------------------------------------------------------------------------------------------------------------------------------------------------------------------------------------------------------------------------------------------------------------------------------------------------------------------------------------------------------------------------------------------------------------------------------------------------------------------------------------------------------------------------------------------------------------------------------------------------------------------------------------------------------------------------------------------------------------------------------------------------------------------------------------------------------------------------------------------------------------------|
| <b>Low-income countries</b><br>Chemotherapy (n = 4)<br>Radiotherapy (n = 0)<br>Immunotherapy (n = 0)<br>Surgery (n = 1)              | <ul style="list-style-type: none"> <li>- Cancelled (n = 2)</li> <li>- Delayed (n = 2)</li> <li>- Shorter duration of treatment (n = 1)</li> <li>- Change in route of administration of chemotherapy agent (n = 1)</li> </ul> NA<br>NA<br><ul style="list-style-type: none"> <li>- Operation performed in an alternative hospital (n = 1)</li> </ul>                                                                                                                                                                                                                                                                                                                                                                                                                                                                                                                                                                                                                                                                                                                                                                                                                                                                                                                                                                                                                                                                                                                                                                                                                                                                                                                                                                                                                               |
| <b>Lower-middle income countries</b><br>Chemotherapy (n = 141)<br>Radiotherapy (n = 32)<br>Immunotherapy (n = 1)<br>Surgery (n = 63) | <ul style="list-style-type: none"> <li>- Cancelled (n = 8)</li> <li>- Delayed (n = 93)</li> <li>- Reduction in dose (n = 7)</li> <li>- Increase in dose (n = 4)</li> <li>- Reduction in the number of cycles (n = 7)</li> <li>- Increase in the number of cycles (n = 8)</li> <li>- Shorter duration of treatment (n = 5)</li> <li>- Longer duration of treatment (n = 19)</li> <li>- Change in choice of agent (n = 21)</li> <li>- Change in route of administration of chemotherapy agent (n = 7)</li> <li>- Change to/addition of an alternative anti-cancer treatment modality (n = 5)</li> </ul> <ul style="list-style-type: none"> <li>- Cancelled (n = 3)</li> <li>- Delayed (n = 25)</li> <li>- Change in modality (n = 3)</li> <li>- Change to/addition of an alternative anti-cancer treatment modality (n = 2)</li> </ul> <ul style="list-style-type: none"> <li>- Delayed (n = 1)</li> </ul> <ul style="list-style-type: none"> <li>- No longer offered (n = 1)</li> <li>- Abandoned (n = 2)</li> <li>- Delayed (n = 45)</li> <li>- Change in choice of operation (n = 8)</li> <li>- Operation performed in an alternative hospital (n = 6)</li> <li>- Underwent neoadjuvant therapy where this would not typically have been indicated (n = 2)</li> <li>- No neoadjuvant therapy given, where this would typically have been indicated (n = 2)</li> <li>- Underwent a longer or more intensive course of neoadjuvant therapy that would have typically been indicated (n = 6)</li> <li>- Underwent a shorter or less intensive course of neoadjuvant therapy that would have typically been indicated (n = 1)</li> <li>- No adjuvant therapy, where this would typically have been indicated (n = 1)</li> <li>- Changed to active palliative care (n = 2)</li> </ul> |
| <b>Upper-middle income countries</b><br>Chemotherapy (n = 44)                                                                        | <ul style="list-style-type: none"> <li>- Cancelled (n = 8)</li> <li>- Delayed (n = 25)</li> <li>- Reduction in dose (n = 3)</li> <li>- Change in choice of agent (n = 9)</li> </ul>                                                                                                                                                                                                                                                                                                                                                                                                                                                                                                                                                                                                                                                                                                                                                                                                                                                                                                                                                                                                                                                                                                                                                                                                                                                                                                                                                                                                                                                                                                                                                                                               |

|                                      |                       |                                                                                                                                                                                                                                                                                                                                                                                                                                                                                                                                                                                                                                                                                                                                                                                                                                                                                                                              |
|--------------------------------------|-----------------------|------------------------------------------------------------------------------------------------------------------------------------------------------------------------------------------------------------------------------------------------------------------------------------------------------------------------------------------------------------------------------------------------------------------------------------------------------------------------------------------------------------------------------------------------------------------------------------------------------------------------------------------------------------------------------------------------------------------------------------------------------------------------------------------------------------------------------------------------------------------------------------------------------------------------------|
|                                      |                       | - Change to/addition of an alternative anti-cancer treatment modality (n = 1)                                                                                                                                                                                                                                                                                                                                                                                                                                                                                                                                                                                                                                                                                                                                                                                                                                                |
|                                      | Radiotherapy (n = 0)  | NA                                                                                                                                                                                                                                                                                                                                                                                                                                                                                                                                                                                                                                                                                                                                                                                                                                                                                                                           |
|                                      | Immunotherapy (n = 1) | - Delayed (n = 1)                                                                                                                                                                                                                                                                                                                                                                                                                                                                                                                                                                                                                                                                                                                                                                                                                                                                                                            |
|                                      | Surgery (n = 20)      | - Delayed (n = 17)<br>- Change in choice of operation (n = 1)<br>- Operation performed in an alternative hospital (n = 2)                                                                                                                                                                                                                                                                                                                                                                                                                                                                                                                                                                                                                                                                                                                                                                                                    |
| <b>High income countries</b>         | Chemotherapy (n = 23) | - Delayed (n = 17)<br>- Reduction in dose (n = 2)<br>- Increase in the number of cycles (n = 1)<br>- Shorter duration of treatment (n = 1)<br>- Change in choice of agent (n = 1)<br>- Change to/addition of an alternative anti-cancer treatment modality (n = 2)                                                                                                                                                                                                                                                                                                                                                                                                                                                                                                                                                                                                                                                           |
|                                      | Radiotherapy (n = 10) | - Delayed (n = 9)<br>- Change in modality (n = 1)                                                                                                                                                                                                                                                                                                                                                                                                                                                                                                                                                                                                                                                                                                                                                                                                                                                                            |
|                                      | Immunotherapy (n = 3) | - Delayed (n = 3)                                                                                                                                                                                                                                                                                                                                                                                                                                                                                                                                                                                                                                                                                                                                                                                                                                                                                                            |
|                                      | Surgery (n = 14)      | - Delayed (n = 12)<br>- Change in choice of operation (n = 1)<br>- Operation performed in an alternative hospital (n = 1)<br>- Underwent a longer or more intensive course of neoadjuvant therapy that would have typically been indicated (n = 1)                                                                                                                                                                                                                                                                                                                                                                                                                                                                                                                                                                                                                                                                           |
|                                      |                       | <b>Reasons for changes to treatment due to the COVID-19 pandemic</b>                                                                                                                                                                                                                                                                                                                                                                                                                                                                                                                                                                                                                                                                                                                                                                                                                                                         |
| <b>Low-income countries</b>          | Chemotherapy          | Decision making (n = 1)<br>- Change in treatment as per local MDT / hospital policy (n = 1)<br>Infrastructure (n = 2)<br>- Lockdown/Travel restrictions prevent access to treatment (n = 2)<br>- Lack of hospital inpatient beds (infrastructure) (n = 2)<br>Workforce (n = 1)<br>- Insufficient staff due to redeployment/restructuring (n = 1)                                                                                                                                                                                                                                                                                                                                                                                                                                                                                                                                                                             |
|                                      | Radiotherapy          | NA                                                                                                                                                                                                                                                                                                                                                                                                                                                                                                                                                                                                                                                                                                                                                                                                                                                                                                                           |
|                                      | Immunotherapy         | NA                                                                                                                                                                                                                                                                                                                                                                                                                                                                                                                                                                                                                                                                                                                                                                                                                                                                                                                           |
|                                      | Surgery               | Service delivery (n = 1)<br>- Transfer to a different institution for treatment (n = 1)                                                                                                                                                                                                                                                                                                                                                                                                                                                                                                                                                                                                                                                                                                                                                                                                                                      |
|                                      |                       |                                                                                                                                                                                                                                                                                                                                                                                                                                                                                                                                                                                                                                                                                                                                                                                                                                                                                                                              |
| <b>Lower-middle income countries</b> | Chemotherapy          | Decision making (n = 55)<br>- Change in treatment as per local MDT / hospital policy (n = 24)<br>- Change in treatment as per regional policy (n = 1)<br>- Change in treatment as per national policy (n = 9)<br>- Change in treatment plan by lead clinician (n = 28)<br>Infrastructure (n = 74)<br>- Lockdown/Travel restrictions prevent access to treatment (n = 66)<br>- Lack of hospital inpatient beds (infrastructure) (n = 13)<br>- Lack of hospital intensive care beds (n = 2)<br>- Lack of outpatient facilities for support post-discharge (n = 4)<br>- Lack of blood products (n = 3)<br>- Lack of personal protective equipment (n = 6)<br>- Lack of drugs (n = 9)<br>Workforce (n = 18)<br>- Insufficient staff due to redeployment/restructuring (n = 16)<br>- Insufficient staff due to sickness (n = 8)<br>Service delivery (n = 14)<br>- No treatment available due to restructuring of services (n = 5) |

|               |                                                                                                                                                                                                                                                                                                                                                                                                                                                                                                                                                                                                                                                                                                                                                                                                                                                                                                                                                                                                                                                                                                                                                                                                                                                                                                                                                                                                                                                                                                                                                                                                |
|---------------|------------------------------------------------------------------------------------------------------------------------------------------------------------------------------------------------------------------------------------------------------------------------------------------------------------------------------------------------------------------------------------------------------------------------------------------------------------------------------------------------------------------------------------------------------------------------------------------------------------------------------------------------------------------------------------------------------------------------------------------------------------------------------------------------------------------------------------------------------------------------------------------------------------------------------------------------------------------------------------------------------------------------------------------------------------------------------------------------------------------------------------------------------------------------------------------------------------------------------------------------------------------------------------------------------------------------------------------------------------------------------------------------------------------------------------------------------------------------------------------------------------------------------------------------------------------------------------------------|
|               | <ul style="list-style-type: none"> <li>- Transfer to a different institution for treatment (n = 9)</li> </ul> <p>Financing (n = 11)</p> <ul style="list-style-type: none"> <li>- Inability to pay for treatment (n = 7)</li> <li>- Loss of employment by caregiver (n = 5)</li> </ul> <p>Patient factors (n = 38)</p> <ul style="list-style-type: none"> <li>- Patient/patient's family chooses to avoid treatment during the pandemic (n = 33)</li> <li>- Treatment not possible as caregiver infected with SARS-CoV-2 and under mandatory isolation (n = 3)</li> <li>- Treatment not possible as patient infected with SARS-CoV-2 and under mandatory isolation (n = 2)</li> </ul> <p>Other factors (n = 7)</p>                                                                                                                                                                                                                                                                                                                                                                                                                                                                                                                                                                                                                                                                                                                                                                                                                                                                              |
| Radiotherapy  | <p>Decision making (n = 10)</p> <ul style="list-style-type: none"> <li>- Change in treatment as per local MDT / hospital policy (n = 4)</li> <li>- Change in treatment as per national policy (n = 2)</li> <li>- Change in treatment plan by lead clinician (n = 4)</li> </ul> <p>Infrastructure (n = 20)</p> <ul style="list-style-type: none"> <li>- Lockdown/Travel restrictions prevent access to treatment (n = 14)</li> <li>- Lack of hospital inpatient beds (infrastructure) (n = 4)</li> <li>- Lack of outpatient facilities for support post-discharge (n = 2)</li> <li>- Lack of personal protective equipment (n = 1)</li> <li>- Lack of equipment (n = 1)</li> </ul> <p>Workforce (n = 9)</p> <ul style="list-style-type: none"> <li>- Insufficient staff due to redeployment/restructuring (n = 9)</li> <li>- Insufficient staff due to sickness (n = 6)</li> </ul> <p>Service delivery (n = 10)</p> <ul style="list-style-type: none"> <li>- No treatment available due to restructuring of services (n = 8)</li> <li>- Transfer to a different institution for treatment (n = 2)</li> </ul> <p>Financing (n = 6)</p> <ul style="list-style-type: none"> <li>- Inability to pay for treatment (n = 5)</li> <li>- Loss of employment by caregiver (n = 1)</li> </ul> <p>Patient factors (n = 8)</p> <ul style="list-style-type: none"> <li>- Patient/patient's family chooses to avoid treatment during the pandemic (n = 6)</li> <li>- Treatment not possible as patient infected with SARS-CoV-2 and under mandatory isolation (n = 2)</li> </ul> <p>Other factors (n = 1)</p> |
| Immunotherapy | <p>Infrastructure (n = 1)</p> <ul style="list-style-type: none"> <li>- Lack of outpatient facilities for support post-discharge (n = 1)</li> </ul>                                                                                                                                                                                                                                                                                                                                                                                                                                                                                                                                                                                                                                                                                                                                                                                                                                                                                                                                                                                                                                                                                                                                                                                                                                                                                                                                                                                                                                             |
| Surgery       | <p>Decision making (n = 19)</p> <ul style="list-style-type: none"> <li>- Change in treatment as per local MDT / hospital policy (n = 12)</li> <li>- Change in treatment as per regional policy (n = 1)</li> <li>- Change in treatment plan by lead clinician (n = 7)</li> </ul> <p>Infrastructure (n = 37)</p> <ul style="list-style-type: none"> <li>- Lockdown/Travel restrictions prevent access to treatment (n = 27)</li> <li>- Lack of hospital inpatient beds (infrastructure) (n = 9)</li> <li>- Lack of hospital intensive care beds (n = 13)</li> <li>- Lack of outpatient facilities for support post-discharge (n = 1)</li> <li>- Lack of blood products (n = 1)</li> <li>- Lack of personal protective equipment (n = 3)</li> <li>- Lack of equipment (n = 2)</li> <li>- Lack of drugs (n = 1)</li> </ul> <p>Workforce (n = 8)</p> <ul style="list-style-type: none"> <li>- Insufficient staff due to redeployment/restructuring (n = 8)</li> <li>- Insufficient staff due to sickness (n = 6)</li> </ul> <p>Service delivery (n = 15)</p>                                                                                                                                                                                                                                                                                                                                                                                                                                                                                                                                        |

|                                      |               |                                                                                                                                                                                                                                                                                                                                                                                                                                                                                                                                                                                                                                                                                                                                                                                                                                                                                                                                                                                                                                                                                                                                        |
|--------------------------------------|---------------|----------------------------------------------------------------------------------------------------------------------------------------------------------------------------------------------------------------------------------------------------------------------------------------------------------------------------------------------------------------------------------------------------------------------------------------------------------------------------------------------------------------------------------------------------------------------------------------------------------------------------------------------------------------------------------------------------------------------------------------------------------------------------------------------------------------------------------------------------------------------------------------------------------------------------------------------------------------------------------------------------------------------------------------------------------------------------------------------------------------------------------------|
|                                      |               | <ul style="list-style-type: none"> <li>- No treatment available due to restructuring of services (n = 9)</li> <li>- Transfer to a different institution for treatment (n = 7)</li> </ul> Financing (n = 3) <ul style="list-style-type: none"> <li>- Inability to pay for treatment (n = 2)</li> <li>- Loss of employment by caregiver (n = 1)</li> </ul> Patient factors (n = 10) <ul style="list-style-type: none"> <li>- Patient/patient's family chooses to avoid treatment during the pandemic (n = 9)</li> <li>- Treatment not possible as caregiver infected with SARS-CoV-2 and under mandatory isolation (n = 1)</li> </ul> Other factors (n = 7)                                                                                                                                                                                                                                                                                                                                                                                                                                                                              |
| <b>Upper-middle income countries</b> | Chemotherapy  | Decision making (n = 36) <ul style="list-style-type: none"> <li>- Change in treatment as per local MDT / hospital policy (n = 31)</li> <li>- Change in treatment as per regional policy (n = 2)</li> <li>- Change in treatment as per national policy (n = 1)</li> <li>- Change in treatment plan by lead clinician (n = 7)</li> </ul> Infrastructure (n = 3) <ul style="list-style-type: none"> <li>- Lockdown/Travel restrictions prevent access to treatment (n = 2)</li> <li>- Lack of hospital inpatient beds (infrastructure) (n = 1)</li> </ul> Service delivery (n = 3) <ul style="list-style-type: none"> <li>- No treatment available due to restructuring of services (n = 2)</li> <li>- Transfer to a different institution for treatment (n = 1)</li> </ul> Patient factors (n = 2) <ul style="list-style-type: none"> <li>- Patient/patient's family chooses to avoid treatment during the pandemic (n = 2)</li> </ul>                                                                                                                                                                                                   |
|                                      | Radiotherapy  | NA                                                                                                                                                                                                                                                                                                                                                                                                                                                                                                                                                                                                                                                                                                                                                                                                                                                                                                                                                                                                                                                                                                                                     |
|                                      | Immunotherapy | Data not available (n = 1)                                                                                                                                                                                                                                                                                                                                                                                                                                                                                                                                                                                                                                                                                                                                                                                                                                                                                                                                                                                                                                                                                                             |
|                                      | Surgery       | Decision making (n = 13) <ul style="list-style-type: none"> <li>- Change in treatment as per local MDT / hospital policy (n = 11)</li> <li>- Change in treatment plan by lead clinician (n = 2)</li> </ul> Infrastructure (n = 15) <ul style="list-style-type: none"> <li>- Lockdown/Travel restrictions prevent access to treatment (n = 15)</li> </ul> Workforce (n = 3) <ul style="list-style-type: none"> <li>- Insufficient staff due to redeployment/restructuring (n = 3)</li> </ul> Service delivery (n = 3) <ul style="list-style-type: none"> <li>- No treatment available due to restructuring of services (n = 1)</li> <li>- Transfer to a different institution for treatment (n = 2)</li> </ul>                                                                                                                                                                                                                                                                                                                                                                                                                          |
| <b>High income countries</b>         | Chemotherapy  | Decision making (n = 12) <ul style="list-style-type: none"> <li>- Change in treatment as per local MDT / hospital policy (n = 4)</li> <li>- Change in treatment as per regional policy (n = 1)</li> <li>- Change in treatment plan by lead clinician (n = 7)</li> </ul> Infrastructure (n = 5) <ul style="list-style-type: none"> <li>- Lockdown/Travel restrictions prevent access to treatment (n = 1)</li> <li>- Lack of hospital inpatient beds (infrastructure) (n = 3)</li> <li>- Lack of outpatient facilities for support post-discharge (n = 1)</li> <li>- Lack of drugs (n = 1)</li> </ul> Workforce (n = 1) <ul style="list-style-type: none"> <li>- Insufficient staff due to sickness (n = 1)</li> </ul> Service delivery (n = 2) <ul style="list-style-type: none"> <li>- Transfer to a different institution for treatment (n = 2)</li> </ul> Patient factors (n = 8) <ul style="list-style-type: none"> <li>- Patient/patient's family chooses to avoid treatment during the pandemic (n = 1)</li> <li>- Treatment not possible as caregiver infected with SARS-CoV-2 and under mandatory isolation (n = 1)</li> </ul> |

|               |                                                                                                                                                                                                                                                                                                                                                                                                                                                                                                                                                                                                                                                                                                                                                                                                                                                                                                                                                                                                                                                                                                           |
|---------------|-----------------------------------------------------------------------------------------------------------------------------------------------------------------------------------------------------------------------------------------------------------------------------------------------------------------------------------------------------------------------------------------------------------------------------------------------------------------------------------------------------------------------------------------------------------------------------------------------------------------------------------------------------------------------------------------------------------------------------------------------------------------------------------------------------------------------------------------------------------------------------------------------------------------------------------------------------------------------------------------------------------------------------------------------------------------------------------------------------------|
|               | <ul style="list-style-type: none"> <li>- Treatment not possible as patient infected with SARS-CoV-2 and under mandatory isolation (n = 3)</li> <li>- Treatment not possible as patient and caregiver under mandatory isolation, but not infected with SARS-CoV-2 (n = 3)</li> </ul> <p>Other factors (n = 2)</p>                                                                                                                                                                                                                                                                                                                                                                                                                                                                                                                                                                                                                                                                                                                                                                                          |
| Radiotherapy  | <p>Decision making (n = 5)</p> <ul style="list-style-type: none"> <li>- Change in treatment as per regional policy (n = 2)</li> <li>- Change in treatment plan by lead clinician (n = 3)</li> </ul> <p>Infrastructure (n = 2)</p> <ul style="list-style-type: none"> <li>- Lockdown/Travel restrictions prevent access to treatment (n = 2)</li> </ul> <p>Service delivery (n = 3)</p> <ul style="list-style-type: none"> <li>- No treatment available due to restructuring of services (n = 1)</li> <li>- Transfer to a different institution for treatment (n = 2)</li> </ul> <p>Patient factors (n = 2)</p> <ul style="list-style-type: none"> <li>- Patient/patient's family chooses to avoid treatment during the pandemic (n = 1)</li> <li>- Treatment not possible as patient infected with SARS-CoV-2 and under mandatory isolation (n = 1)</li> </ul> <p>Other factors (n = 1)</p>                                                                                                                                                                                                               |
| Immunotherapy | <p>Decision making (n = 2)</p> <ul style="list-style-type: none"> <li>- Change in treatment as per local MDT / hospital policy (n = 1)</li> <li>- Change in treatment plan by lead clinician (n = 1)</li> </ul> <p>Patient factors (n = 1)</p> <ul style="list-style-type: none"> <li>- Patient/patient's family chooses to avoid treatment during the pandemic (n = 1)</li> </ul>                                                                                                                                                                                                                                                                                                                                                                                                                                                                                                                                                                                                                                                                                                                        |
| Surgery       | <p>Decision making (n = 7)</p> <ul style="list-style-type: none"> <li>- Change in treatment as per local MDT / hospital policy (n = 3)</li> <li>- Change in treatment as per regional policy (n = 2)</li> <li>- Change in treatment as per national policy (n = 1)</li> <li>- Change in treatment plan by lead clinician (n = 1)</li> </ul> <p>Infrastructure (n = 4)</p> <ul style="list-style-type: none"> <li>- Lockdown/Travel restrictions prevent access to treatment (n = 3)</li> <li>- Lack of hospital intensive care beds (n = 1)</li> </ul> <p>Service delivery (n = 4)</p> <ul style="list-style-type: none"> <li>- Transfer to a different institution for treatment (n = 4)</li> </ul> <p>Financing (n = 2)</p> <ul style="list-style-type: none"> <li>- Inability to pay for treatment (n = 2)</li> </ul> <p>Patient factors (n = 2)</p> <ul style="list-style-type: none"> <li>- Patient/patient's family chooses to avoid treatment during the pandemic (n = 1)</li> <li>- Treatment not possible as caregiver infected with SARS-CoV-2 and under mandatory isolation (n = 1)</li> </ul> |
