# Supplementary material for: Twelve-month observational study of children with cancer in 41 countries during the COVID-19 pandemic
Source: PubMed Central journal article supplement — BMJ Glob Health. 2022 Oct 19;7(10):e008797. doi: 10.1136/bmjgh-2022-008797 (PMC9581782; doi:10.1136/bmjgh-2022-008797), 2022-10-19
Supplement: bmjgh-2022-008797supp008.pdf [file bmjgh-2022-008797supp008.pdf]

**Author Reflexivity Statement**

How does this study address local research and policy priorities?

The study was conceived together with local researchers in LMICs following concerns regarding the care of paediatric cancer patients in HICs and LMICs. Therefore, this study was designed in a way to best address the questions and priorities of researchers, clinicians, and policy makers in both HICs and LMICs.

How were local researchers involved in study design?

Local researchers were involved in the conception, design, conduct, interpretation, and writing of this manuscript. Therefore, they have been involved and led every aspect of this study.

How has funding been used to support the local research team(s)?

All the funding has gone to support local research teams in conducting this study. None of this funding has been used by HIC collaborators. Funding has also been used to support and develop a research capacity building course.

How are research staff who conducted data collection acknowledged?

All individuals who were involved in collecting data are listed as collaborative authors as per our study protocol.

How have members of the research partnership been provided with access to study data?

All individuals have been provided with access to data collected from their centre. We have also provided country-level data to all centres within a country where requested.

How were data used to develop analytical skills within the partnership?

A research capacity building course was utilised which allowed all members to develop statistical skills

How have research partners collaborated in interpreting study data?

Conversations have been held with various research partners to establish their interpretation of the results, and these have been incorporated into the study manuscript.

How were research partners supported to develop writing skills?

The research team writing this statement is composed of authors from HICs and LMICs of various levels of academic seniority.

How will research products be shared to address local needs?

This publication will be published as open access. We have developed a post-publication dissemination plan to distribute recommendations across a wide constituency. This will include engagement with research leaders in global health, cancer, and paediatrics, and with journalists based in HICs and LMICs.

How is the leadership, contribution and ownership of this work by LMIC researchers recognised within the authorship?

They are all listed as authors and their specific roles have been outlined.

How have early career researchers across the partnership been included within the authorship team?

They are all listed as authors and their specific roles have been outlined. Early career researchers have been involved in all aspects of this study.

How has gender balance been addressed within the authorship?

The chief investigator of this study is a female originally from South Africa (Professor Kokila Lakhoo). We have females from both LMICs and HICs at all levels of seniority present in our authorship.

How has the project contributed to training of LMIC researchers?

We have used a research capacity building course to train LMIC researchers in designing and conducting their own studies in the future.

How has the project contributed to improvements in local infrastructure?

The results from this project will be used by local researchers to quality improvement projects and get buy-in for improvements in local infrastructure

What safeguarding procedures were used to protect local study participants and researchers?

There was no primary data collection as part of this project, therefore this question is not directly applicable. We have specifically considered the issue of safeguarding within the study protocol.
